# Supplementary material for: Structure of the full-length human Pannexin1 channel and insights into its role in pyroptosis
Source: PubMed Central journal article supplement (PMC8096850; doi:10.1038/s41421-021-00259-0), 2021-05-04
Supplement: 41421_2021_259_MOESM1_ESM.pdf [file 41421_2021_259_MOESM1_ESM.pdf]

**Supplementary Fig. S11c**

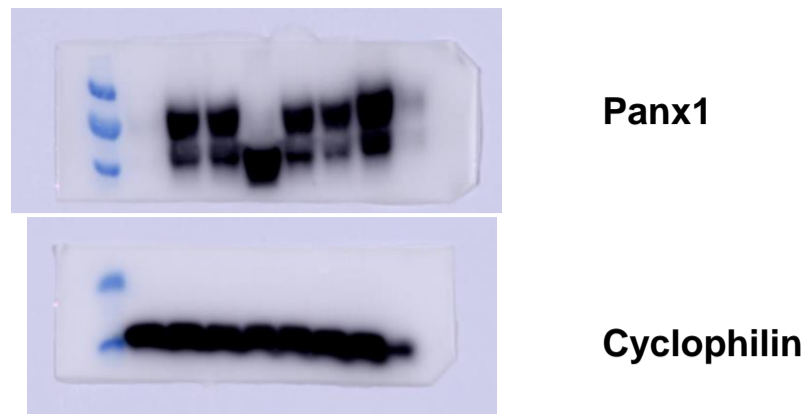

**Supplementary Fig. S9b**

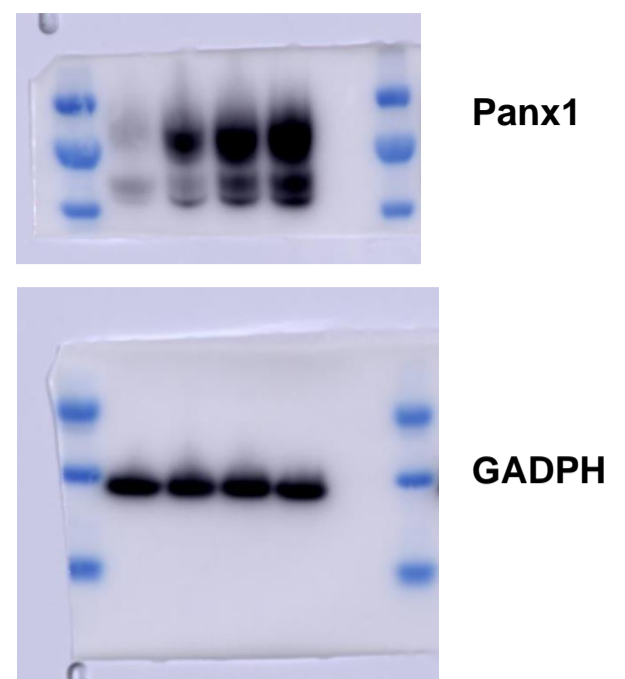

**Figure 2c and 4b**

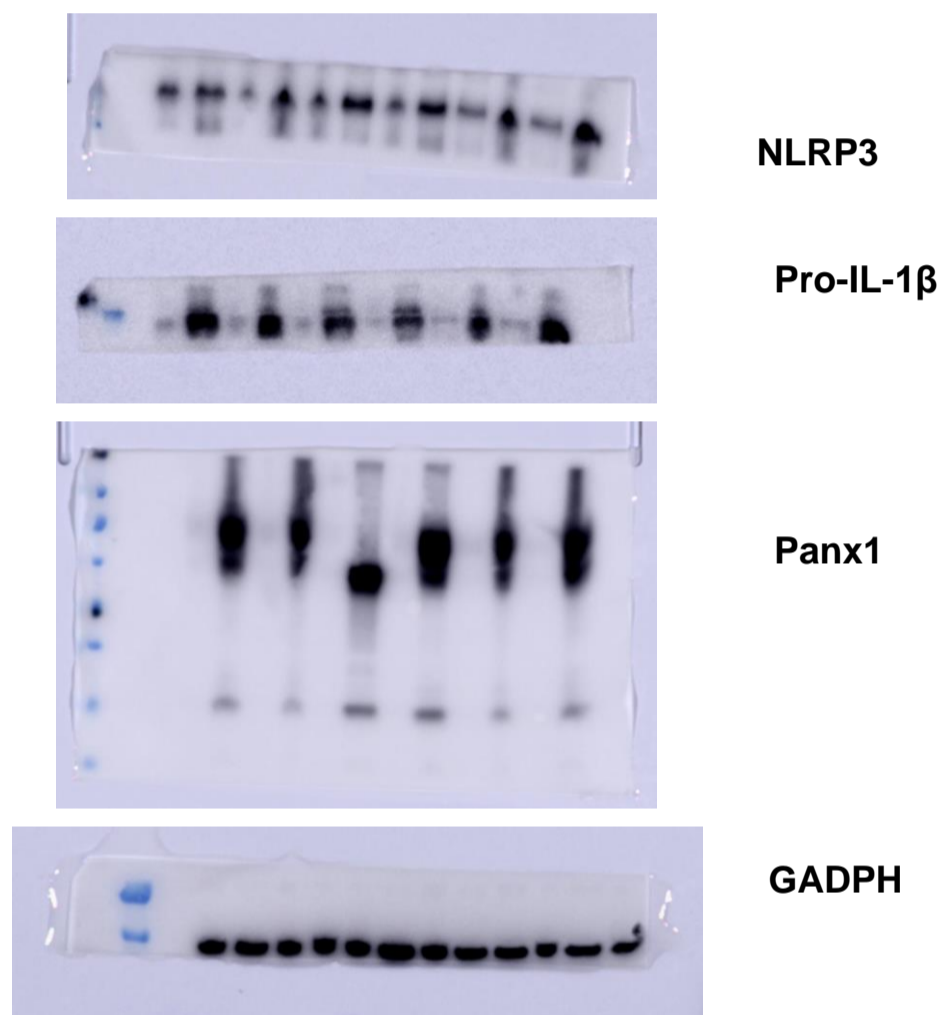

**Supplementary Fig. S1a,b**

Before digest                      After PNGase Digest  
10ml 10.5ml 11ml    Marker 10ml 10.5ml 11ml

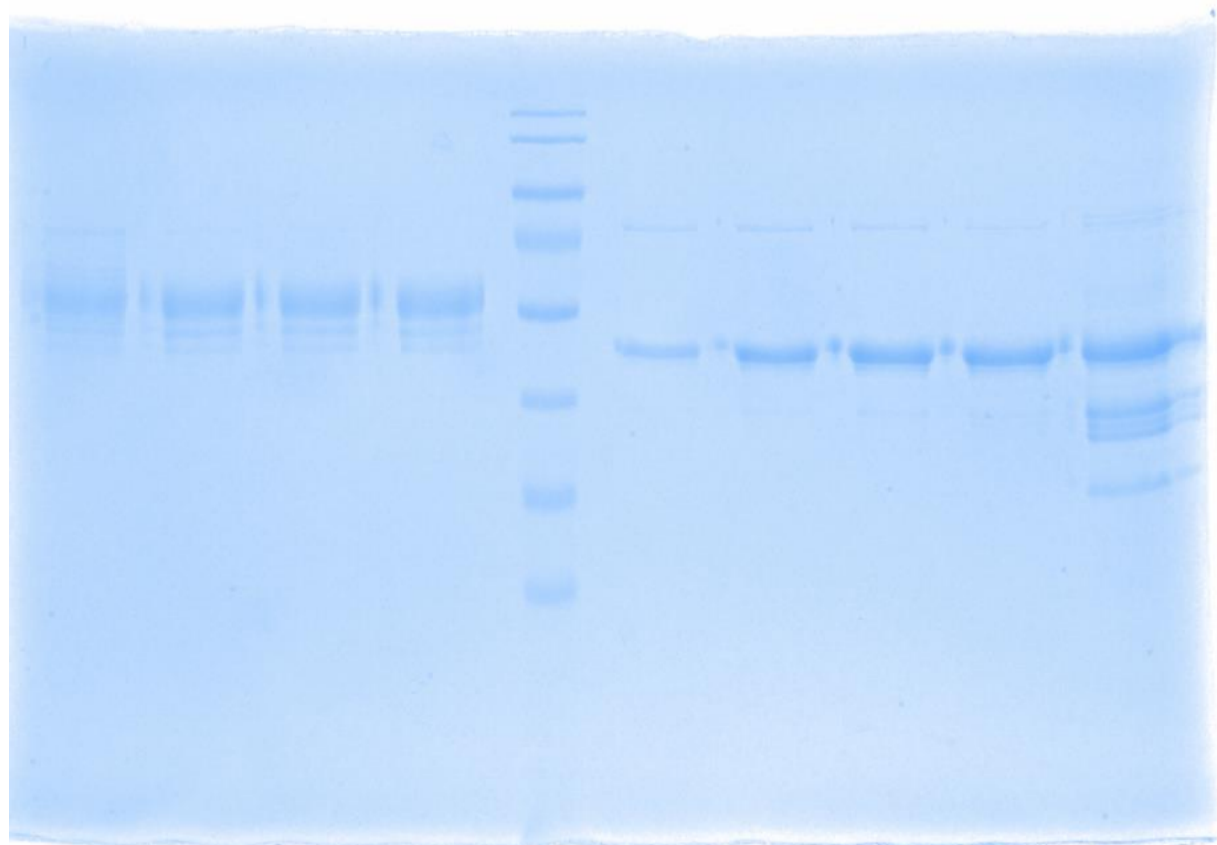

**Wild Type hPannexin1**

Marker 9.5ml 10ml 10.5ml 11ml

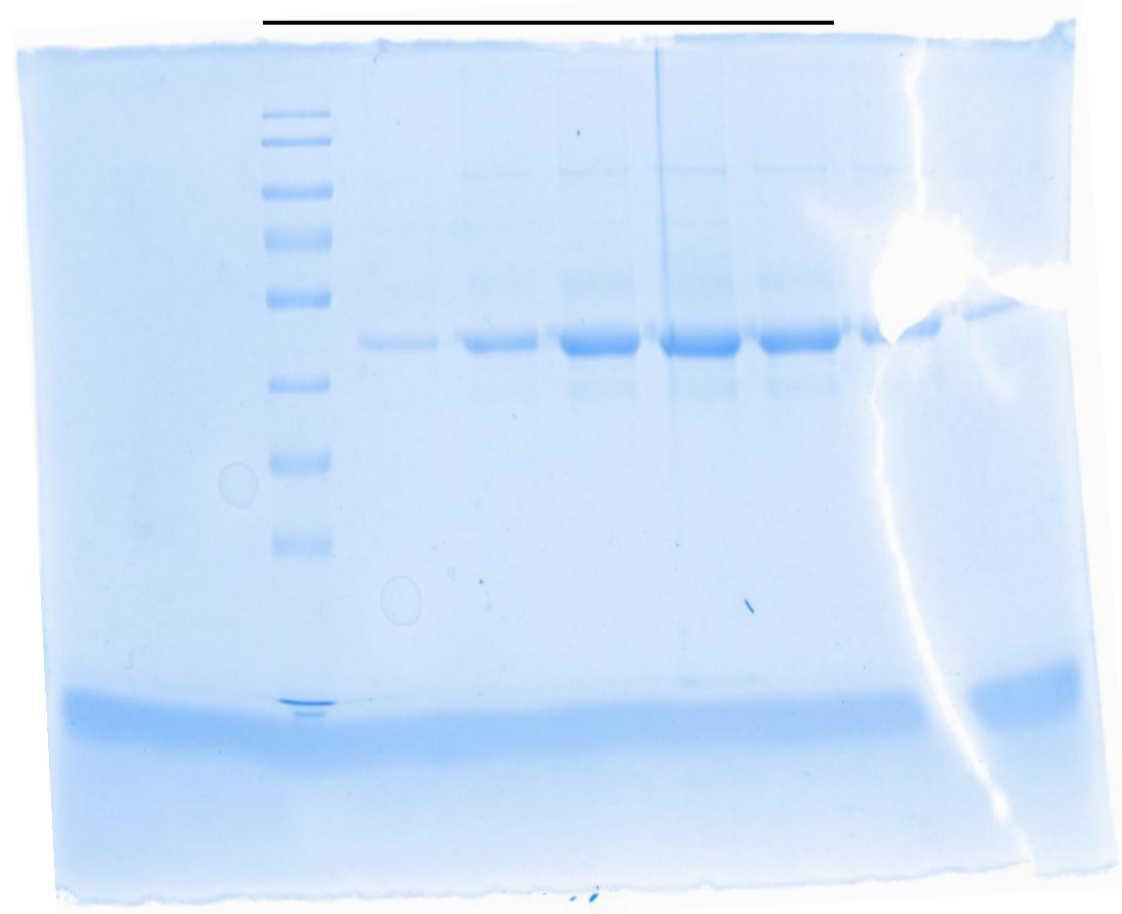

**N255Q hPannexin1**
